# Supplementary material
Source: PubMed Central journal article supplement (PMC4074444)
Supplement: NIHMS598953-supplement-01.pdf [file NIHMS598953-supplement-01.pdf]

**Table S1. Genotype distribution at weaning**

| <b>Sire<br/>Genotype</b> | <b>Dam<br/>Genotype</b> | <b>Total<br/>Pups</b> | <b>WT</b> | <b>Heterozygotes</b> | <b>KO</b> |
|--------------------------|-------------------------|-----------------------|-----------|----------------------|-----------|
| Mpc2 <sup>+/-</sup>      | Mpc2 <sup>+/-</sup>     | 78                    | 24        | 54                   | 0         |
| Mpc2 <sup>Δ16/-</sup>    | Mpc2 <sup>Δ16/-</sup>   | 117                   | 29        | 59                   | 29        |

**Table S2. Embryonic Day 10-11 Genotypes**

| <b>Sire<br/>Genotype</b> | <b>Dam<br/>Genotype</b> | <b>Total<br/>Pups</b> | <b>WT</b> | <b>Heterozygotes</b> | <b>KO</b> |
|--------------------------|-------------------------|-----------------------|-----------|----------------------|-----------|
| Mpc2 <sup>+/-</sup>      | Mpc2 <sup>+/-</sup>     | 87                    | 25        | 45                   | 17        |

**Table S3. Embryonic Day 13 Genotypes**

| <b>Sire<br/>Genotype</b> | <b>Dam<br/>Genotype</b> | <b>Total<br/>Pups</b> | <b>WT</b> | <b>Heterozygotes</b> | <b>KO</b> |
|--------------------------|-------------------------|-----------------------|-----------|----------------------|-----------|
| Mpc2 <sup>+/-</sup>      | Mpc2 <sup>+/-</sup>     | 23                    | 9         | 12                   | 2*        |

\*Embryonic fibroblasts from KO embryos were not viable in culture.

**Table S4. qPCR Primers**

---

|                   | <b>Sequence (5'-3')</b>    |
|-------------------|----------------------------|
| <b>36B4 - FWD</b> | GCAGACAACGTGGGCTCCAAGCAGA  |
| <b>36B4 - REV</b> | GGTCCTCCTTGGTGAACACGAAGCCC |
| <b>Fbp - FWD</b>  | AGCCTTCTGAGAAGGATGCTC      |
| <b>Fbp - REV</b>  | GTCCAGCATGAAGCAGTTGAC      |
| <b>G6pc - FWD</b> | GTGGCAGTGGTCGGAGACT        |
| <b>G6pc - REV</b> | ACGGGCGTTGTCCAAAC          |
| <b>Mpc1 - FWD</b> | GACTTTCGCCCTCTGTTGCTA      |
| <b>Mpc1 - REV</b> | GAGGTTGTACCTTGTAGGCAAAT    |
| <b>Mpc2 - FWD</b> | CCGCCGCGATGGCAGCTG         |
| <b>Mpc2 - REV</b> | GCTAGTCCAGCACACACCAATCC    |
| <b>Pcx - FWD</b>  | GATGACCTCACAGCCAAGCA       |
| <b>Pcx - REV</b>  | GGGTACCTCTGTGTCCAAAGGA     |
| <b>Pck1 - FWD</b> | GGGTGCAGAATCTCGAGTTG       |
| <b>Pck1 - REV</b> | CACCATCACCTCCTGGAAGA       |
| <b>Pck2 - FWD</b> | ATGGCTGCTATGTACCTCCC       |
| <b>Pck2 - REV</b> | GCGCCACAAAGTCTCGAA         |

---

# Figure S1

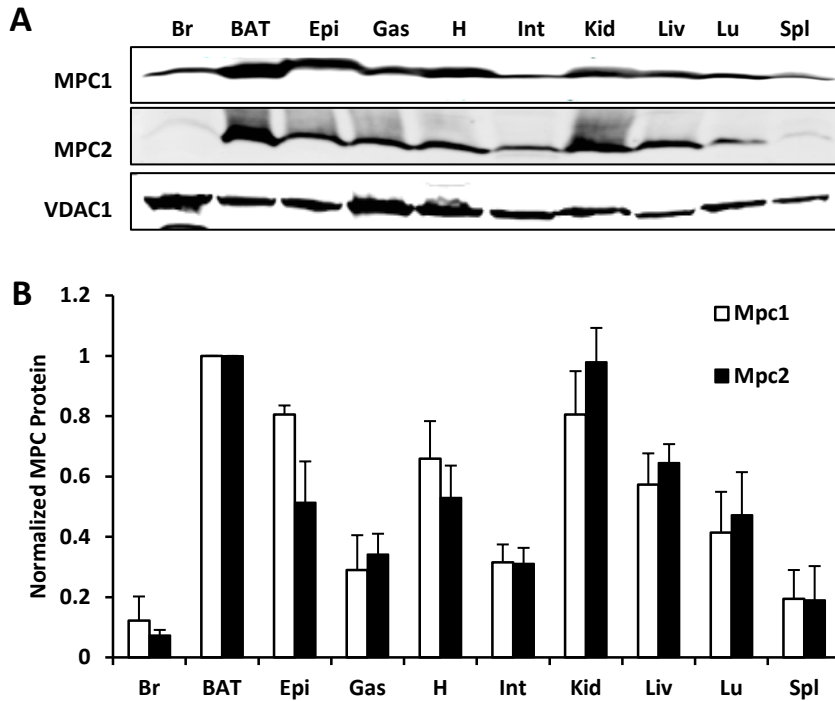

**Figure S1. Tissue expression profile of MPC1 and MPC2 in WT C57B6 mice. (A)**

Western blot depicting the protein distribution of MPC1 and MPC2 in mitochondrial lysates of WT C57Bl/6 mice. Equal amounts of mitochondrial protein were loaded for each tissue. Voltage-dependent anion channel-1 (VDAC1) is used as a loading control.

**(B)** Quantified densitometry of western blot shown in (A). Data are presented as mean  $\pm$  SEM (n=3 separate animals). Abbreviations: brain (Br), brown adipose tissue (BAT), epididymal adipose tissue (Epi), perirenal adipose tissue (PR), gastrocnemius (Gas), soleus (Sol), heart (H), intestine (Int), kidney (Kid), liver (Liv), lung (Lu), and spleen (Spl). Data are presented as mean  $\pm$  SEM of 5 separate animals.

# Figure S2

**A**

WT - ATG GCA GCT GCC GGC GCC CGA GGC CTG CGG GCC ACC TAC CAC CGA CTC ATG

Mpc2<sup>+/-</sup> - ATG **GCA** GCT GCC GGC GCC CGA GGC CTG CGG GCC ACC TAC CAC CGA CTC ATG

Mpc2 $\Delta$ 16 - **ATG** **GCA GCT GCC GGC GCC CGA** GGC CTG CGG GCC ACC TAC CAC CGA CTC ATG

**B**

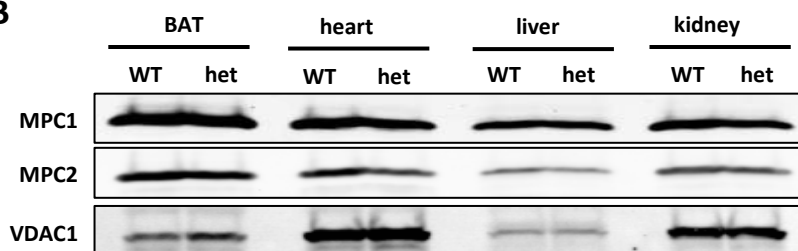

**C**

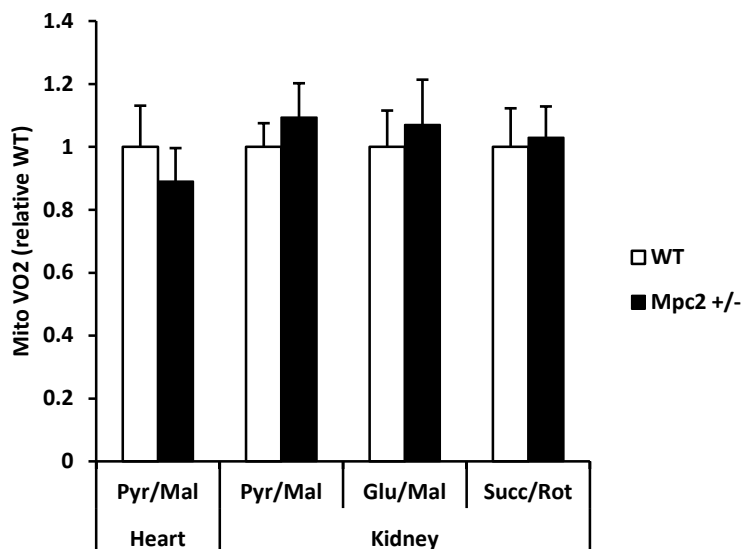

**Figure S2. Generation of MPC2 deficient mice. (A)** The shaded sequence indicates the deleted nucleotides for each transgenic mouse. **(B)** Western blot depicting the abundance of MPC1 and MPC2 protein in mitochondrial lysates of various tissues from Mpc2<sup>+/-</sup> mice and WT controls. Voltage-dependent anion channel-1 (VDAC1) is used as a loading control. **(C)** ADP-stimulated rates of oxygen consumption by mitochondria isolated from heart or kidney of WT or Mpc2<sup>+/-</sup> mice in the presence of the indicated substrates (n=8).

# Figure S3

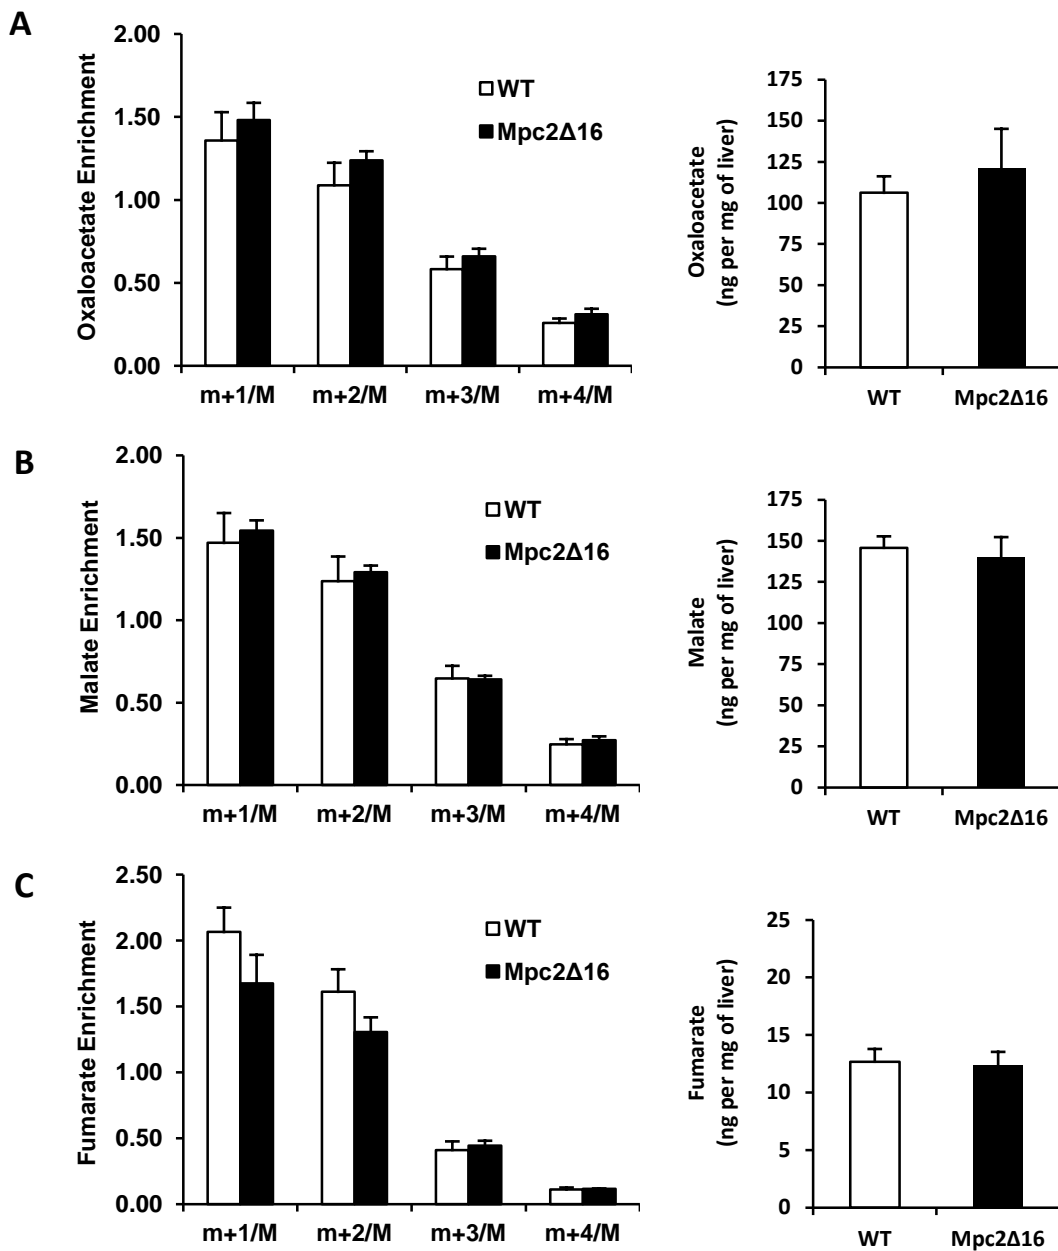

**Figure S3. Hepatic organic acid enrichment and concentration are unaltered in *Mpc2*<sup>Δ16</sup> mice.** <sup>13</sup>C enrichment of isotopomers and total concentration of hepatic oxaloacetate (A), malate (B), and fumarate (C) in mice 60 minutes after i.p. <sup>13</sup>C-pyruvate challenge (n=7). Data are presented as mean ± SEM. \*P < 0.05
